# Supplementary material for: Prediction of dissolution profiles of sinomenine hydrochloride sustained-release tablets part I: using near-infrared spectra as predictors
Source: Royal Society of Chemistry journal article supplement (doi:10.1039/d3nj01896b), 2023-01-01
Supplement: d3nj01896b1.pdf [file d3nj01896b1.pdf]

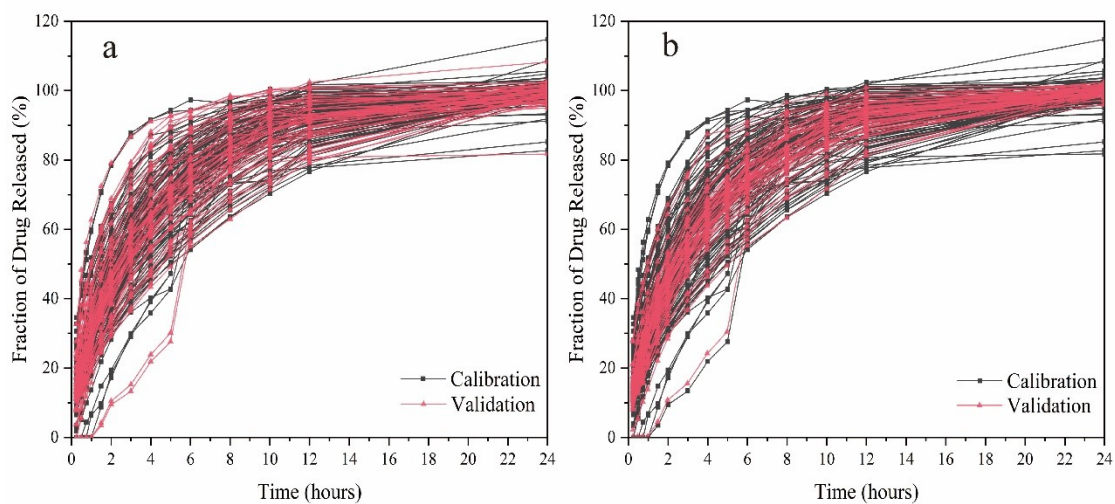

Fig.S1 Dissolution profiles of 174 tablets after sample set partitioning for (a) KS method (b) SPXY method
